# Supplementary material for: Seasonal and year-round use of the Kushiro Wetland, Hokkaido, Japan by sika deer (Cervus nippon yesoensis)
Source: PeerJ. 2017 Oct 12;5:e3869. doi: 10.7717/peerj.3869 (PMC5641432; doi:10.7717/peerj.3869)
Supplement: Supplemental Information 1 — COA location for each individual. COAs were calculated using seasonal home ranges. The X and Y coordinates (in UTM; m) of individual COAs are shown for each season. Seasons are labeled as winter 1 (first winter), summer, and winter 2 (second winter) with period defined via the NSD method (see the Methods section in the manuscript). [file peerj-05-3869-s005.xlsx]

## Sheet: location of COA
Capture site	deer ID	migration type	winter1X	winter1Y	summerX	summerY	winter2X	winter2Y
takkobu	35285	Migration	299321	4.78079e+06	339031	4.83832e+06	302700	4.78731e+06
takkobu	36750	Atypical	294963	4.77668e+06	293418	4.79294e+06	293475	4.79269e+06
takkobu	36751	Atypical	295975	4.77625e+06	333945	4.81861e+06	308802	4.79172e+06
takkobu	36748	Migration	297748	4.77885e+06	309594	4.82421e+06	298016	4.78022e+06
takkobu	36755	Atypical	295094	4.77665e+06	332850	4.80174e+06	295169	4.77648e+06
takkobu	36754	Migration	297613	4.77884e+06	312444	4.81908e+06	296989	4.77876e+06
takkobu	36749	Atypical	295622	4.77621e+06	291532	4.79791e+06	293703	4.7779e+06
takkobu	36753	Migration	295658	4.77639e+06	291936	4.78209e+06	295589	4.77648e+06
kottaro	36736	Atypical	294848	4.7834e+06	289317	4.77671e+06	288797	4.77595e+06
kottaro	36740	Atypical	295315	4.78196e+06	295131	4.78245e+06	294190	4.78135e+06
kottaro	36733	Atypical	293472	4.78365e+06	284314	4.76843e+06	284051	4.76845e+06
kottaro	36738	Atypical	295481	4.78169e+06	292467	4.78226e+06	295224	4.7818e+06
kottaro	36735	Atypical	294613	4.78408e+06	291226	4.77591e+06	291334	4.77561e+06
kottaro	32532	Atypical	295473	4.7814e+06	295408	4.78555e+06	294249	4.78045e+06
kottaro	36737	Dispersal	296685	4.78528e+06	282669	4.7685e+06	282559	4.76816e+06
kottaro	36734	Dispersal	293920	4.78236e+06	284025	4.76883e+06	283965	4.76854e+06
kottaro	36739	Resident	295503	4.7818e+06	295414	4.78178e+06	295420	4.78182e+06
embankment	36724	Atypical	288058	4.77108e+06	288046	4.77187e+06	287827	4.77242e+06
embankment	36725	Migration	286504	4.77964e+06	285067	4.77588e+06	286504	4.77621e+06
embankment	36726	Atypical	285544	4.78061e+06	287982	4.77177e+06	287820	4.77243e+06
embankment	36728	Migration	286574	4.77959e+06	284954	4.77571e+06	286774	4.77968e+06
embankment	36731	Migration	295425	4.7663e+06	287059	4.76885e+06	294852	4.76718e+06
embankment	36741	Atypical	295232	4.77948e+06	289167	4.77441e+06	291408	4.77739e+06
embankment	36727	Resident	288105	4.77099e+06	287895	4.77256e+06	287877	4.7726e+06
embankment	36732	Atypical	287764	4.77226e+06	287752	4.77272e+06	287603	4.77307e+06
