# Supplementary material for: Seasonal and year-round use of the Kushiro Wetland, Hokkaido, Japan by sika deer (Cervus nippon yesoensis)
Source: PeerJ. 2017 Oct 12;5:e3869. doi: 10.7717/peerj.3869 (PMC5641432; doi:10.7717/peerj.3869)
Supplement: Supplemental Information 4 — Annual home range size (m2); home range in wetland (m2), amount of the annual home range comprised of wetland habitat (m2); home range outside wetland, amount of home range comprised of non-wetland habitat (m2), percent wetland (%), home range in wetland/annual home range size for each individual. These data are summarized in Table 3. [file peerj-05-3869-s008.xlsx]

## Sheet: Raw data of Table1 and2_migrati
capture_site	deer_ID	seasonal movement type	annual_home_range(㎡)	home_range_in_wetland(㎡)	home_range_out_wetland(㎡)	wetland_use_ratio(%)
Kottaro	32532	Atypical	2.21805e+06	1.84311e+06	374934	83.0962
Kottaro	36733	Atypical	2.33028e+06	1.19131e+06	1.13897e+06	51.1229
Kottaro	36734	Dispersal	3.59804e+06	2.51761e+06	1.08043e+06	69.9718
Kottaro	36735	Atypical	2.96506e+06	2.96506e+06	0	100
Kottaro	36736	Atypical	1.27761e+06	1.27761e+06	0	100
Kottaro	36737	Dispersal	2.5647e+06	959171	1.60553e+06	37.3989
Kottaro	36738	Atypical	2.18211e+06	1.90155e+06	280567	87.1424
Kottaro	36739	Resident	470223	283619	186604	60.3158
Kottaro	36740	Atypical	1.27814e+06	1.17754e+06	100600	92.1292
Takkobu	35285	Migration	2.20856e+07	1.57994e+06	2.05057e+07	7.1537
Takkobu	36748	Migration	2.75053e+07	4.29023e+06	2.3215e+07	15.5978
Takkobu	36749	Atypical	8.09448e+06	1.965e+06	6.12948e+06	24.2759
Takkobu	36750	Atypical	2.44109e+06	696245	1.74484e+06	28.5219
Takkobu	36751	Atypical	1.75957e+07	481778	1.71139e+07	2.73804
Takkobu	36753	Migration	2.66191e+06	1.03688e+06	1.62503e+06	38.9524
Takkobu	36754	Migration	3.1242e+07	5.01399e+06	2.6228e+07	16.0489
Takkobu	36755	Atypical	2.05916e+07	4.29152e+06	1.63001e+07	20.8411
The enbankment	36724	Atypical	1.02775e+06	664322	363425	64.6387
The enbankment	36725	Migration	3.1264e+06	3.00599e+06	120410	96.1486
The enbankment	36726	Atypical	2.82205e+06	2.34712e+06	474934	83.1706
The enbankment	36727	Resident	2.46486e+06	1.99241e+06	472451	80.8326
The enbankment	36728	Migration	2.62119e+06	2.51371e+06	107475	95.8997
The enbankment	36731	Migration	2.71671e+06	411316	2.3054e+06	15.1402
The enbankment	36732	Atypical	2.048e+06	1.85664e+06	191365	90.656
The enbankment	36741	Atypical	2.55878e+06	2.38377e+06	175014	93.1603
