# Supplementary material for: Seasonal and year-round use of the Kushiro Wetland, Hokkaido, Japan by sika deer (Cervus nippon yesoensis)
Source: PeerJ. 2017 Oct 12;5:e3869. doi: 10.7717/peerj.3869 (PMC5641432; doi:10.7717/peerj.3869)
Supplement: Supplemental Information 5 — Migration initiation data for each individual exhibiting movement classified as migration. [file peerj-05-3869-s009.xlsx]

## Sheet: Sheet1
Capture site	deer ID	year	starting day of spring migration	starting day of autumn migration
Takkobu	35285	2014	2014/5/5	2014/9/5
Takkobu	36748	2015	2015/4/14	2015/11/18
Takkobu	36754	2015	2015/4/19	2015/11/19
Takkobu	36753	2015	2015/4/11	2015/12/26
The embankment	36725	2015	2015/3/23	2016/3/15
The embankment	36728	2015	2015/3/28	2016/3/5
The embankment	36731	2015	2015/3/30	2015/11/24
